# Supplementary material for: A novel method for the preparation of solvent-free, microwave-assisted and nitrogen-doped carbon dots as fluorescent probes for chromium(vi) detection and bioimaging
Source: Royal Society of Chemistry journal article supplement (doi:10.1039/c9ra00290a), 2019-01-01
Supplement: c9ra00290a1.pdf [file c9ra00290a1.pdf]

Supporting Information for

**A novel method for preparing solvent-free, microwave-assistant and nitrogen-doped carbon dots as fluorescent probes for chromium(VI) detection and bio-imaging**

Meng Cao<sup>abc</sup>, Yong Li<sup>abc</sup>, Yunze Zhao<sup>abc</sup>, Chongyang Shen<sup>abc</sup>, Hongyan Zhang<sup>d</sup> and Yuanfang Huang<sup>abc\*</sup>

a College of Resources and Environment Sciences, China Agricultural University, Beijing 100193, China

b Key Laboratory of Agricultural Land Quality, Ministry of Natural Resources, Beijing 100193, China

c Key Laboratory of Arable Land Conservation (North China), Ministry of Agriculture and Rural Affairs, Beijing 100193, China

d College of Science, China Agricultural University, Beijing 100193, China

\* Corresponding author

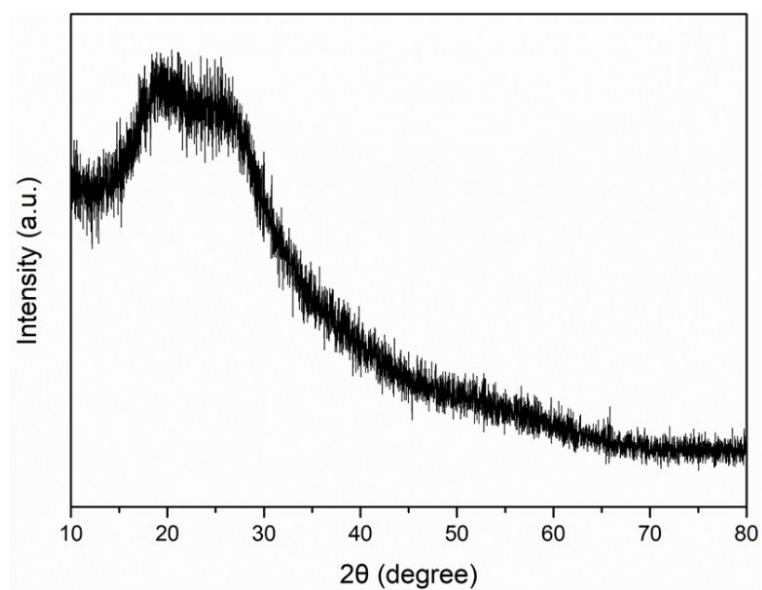

Figure S1. XRD spectrum of N-CDs.

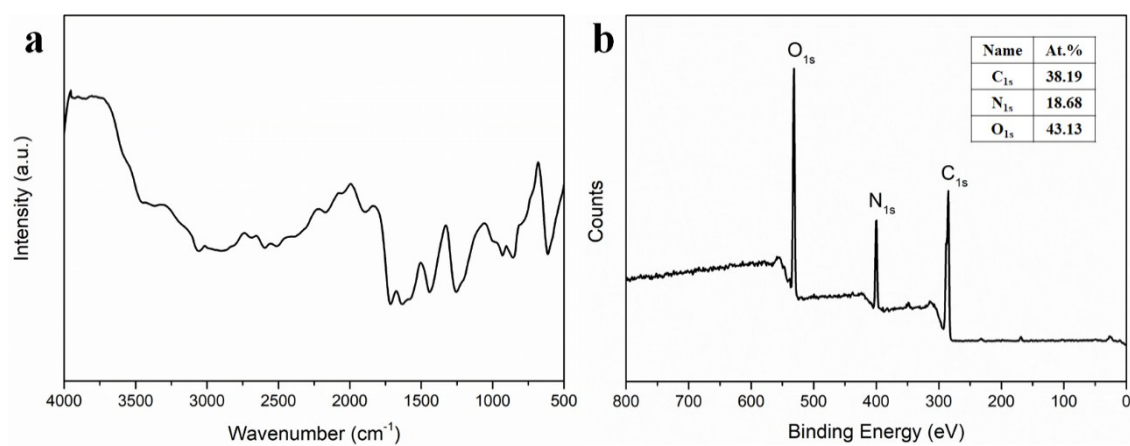

Figure S2. (a) FTIR and (b) XPS spectra of N-CDs.

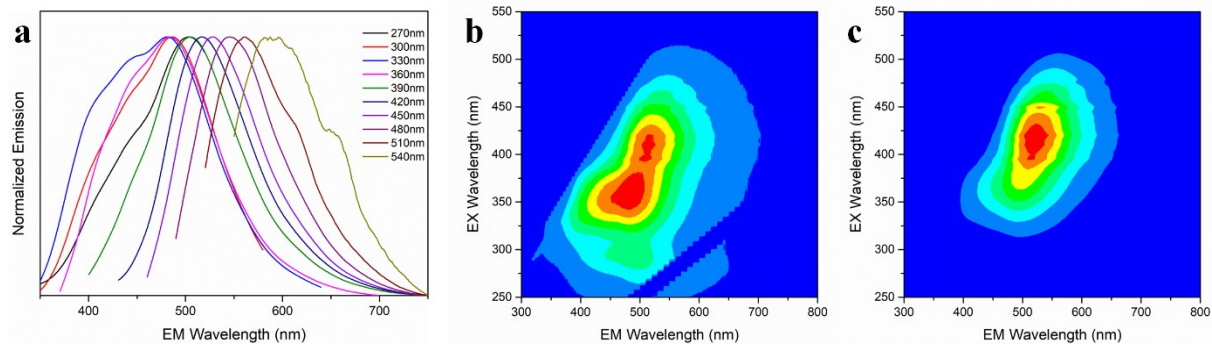

Figure S3. (a) Normalized emission spectra of N-CDs corresponding to Figure 3b. 3D fluorescent spectrogram of N-CDs at the concentration of (b) 0.01 mg mL<sup>-1</sup> and (c) 1 mg mL<sup>-1</sup>.

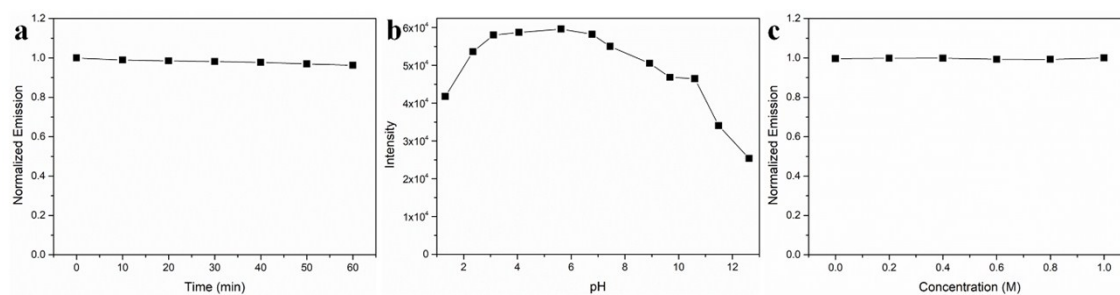

Figure S4. The emission changes of N-CDs under (a) 365 nm UV irradiation, (b) different pH, and (c) different concentration of NaCl.
